# Supplementary material for: Metal–organic framework derived small sized metal sulfide nanoparticles anchored on N-doped carbon plates for high-capacity energy storage
Source: Royal Society of Chemistry journal article supplement (doi:10.1039/c9dt00195f), 2019-01-01
Supplement: c9dt00195f1.pdf [file c9dt00195f1.pdf]

Electronic Supplementary Information for  
**Engineering robust interface with dual transfer routes to  
boost the capability of metal-organic framework derived  
metal sulfide for energy storage**

Zi-Bo Zhai <sup>a</sup>, Ke-Jing Huang <sup>a,\*</sup>, Xu Wu <sup>b,\*</sup>, Han Hu <sup>a</sup>, Yun Xu <sup>a</sup>, Rui-Min Chai <sup>a</sup>

<sup>a</sup> College of Chemistry and Chemical Engineering, Xinyang Normal University, Xinyang 464000, China, E-mail: kejinghuang@163.com

<sup>b</sup> College of Physics and Electronic Engineering, Xinyang Normal University, Xinyang 464000, China, E-mail: xwu@xynu.edu.cn

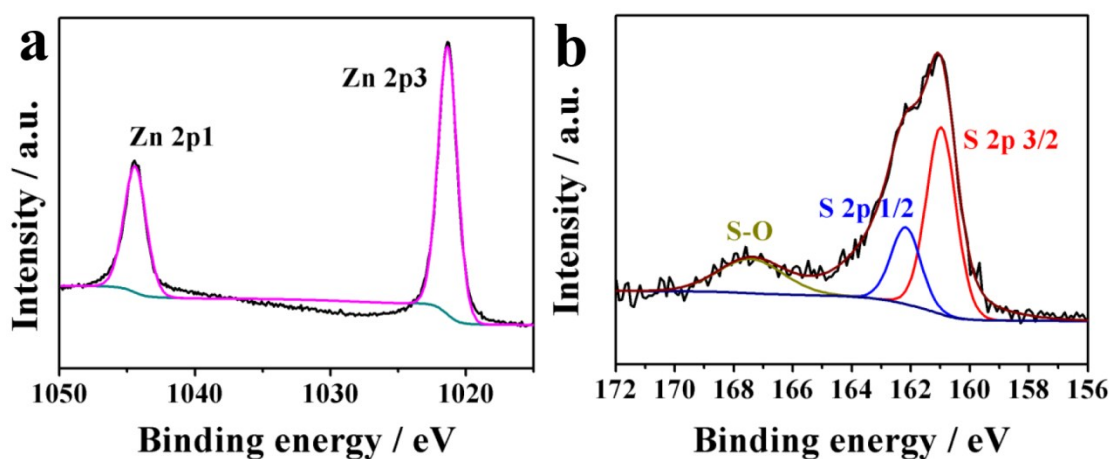

**Figure S1.** (a) Zn 2p and (b) S 2p XPS spectral of ZnS/NMC.

**Table S1.** XPS survey results of ZnS/NMC.

| Element  | C 1s | N 1s | O 1s | Zn 2p | S 2p |
|----------|------|------|------|-------|------|
| Atomic % | 55.5 | 17.6 | 11.4 | 7.9   | 7.6  |

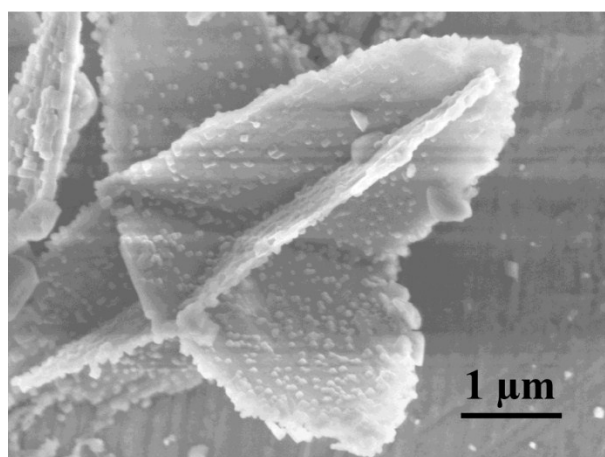

**Figure S2.** SEM image of Zn-MOF.

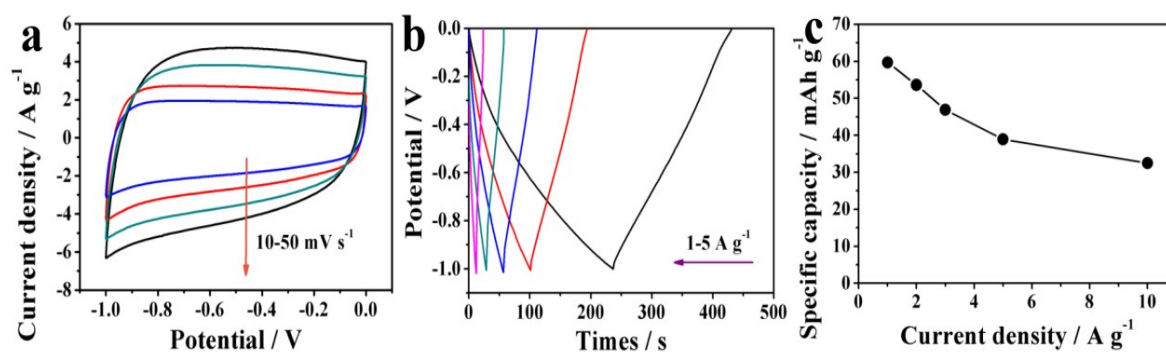

**Figure S3.** Electrochemical performance of active carbon (AC) anode. (a) CVs at different scan rates; (b) GCDs at different current densities; (c) capacities at different current densities. Capacities at 1, 2, 3, 5 and 10 A g<sup>-1</sup> are 60, 54, 47, 39 and 33 mAh g<sup>-1</sup>, respectively.

**Table S2.** Capacities of asymmetric devices with different mass ratio of AC and ZnS/NMC at the current density of 1 A g<sup>-1</sup>.

|                                 |      |      |      |      |      |
|---------------------------------|------|------|------|------|------|
| $m_{\text{ZnS/NMC}}$ (mg)       | 1    | 1    | 1    | 1    | 1    |
| $m_{\text{AC}}$ (mg)            | 1    | 1.5  | 2    | 2.5  | 2.7  |
| Capacity (mAh g <sup>-1</sup> ) | 42.1 | 56.9 | 40.7 | 29.3 | 16.9 |

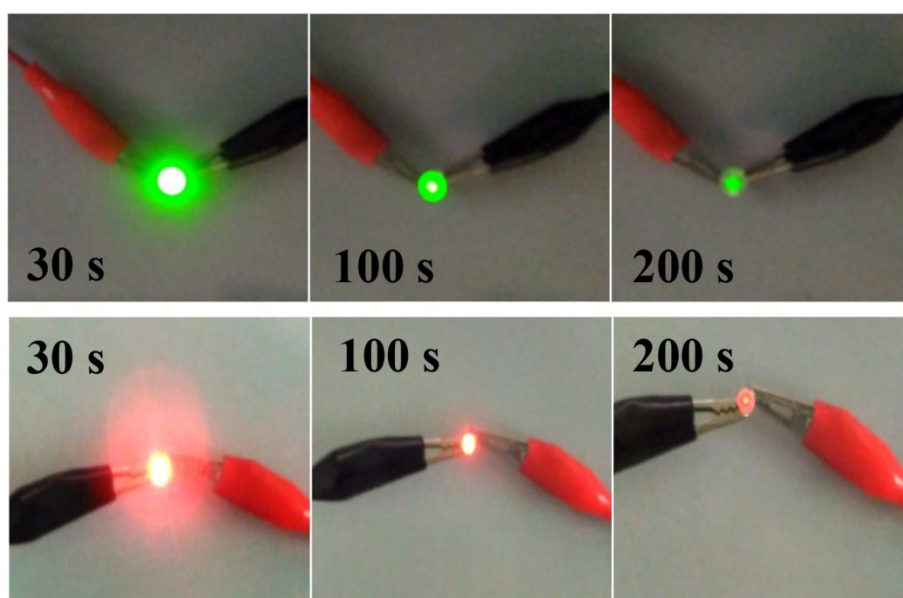

**Figure S4.** The LEDs powered by assembled asymmetric device at different times.
